# Supplementary material for: Spectroelectrochemical investigation of redox states in a polypyrrole/lignin composite electrode material
Source: Royal Society of Chemistry journal article supplement (doi:10.1039/c5ta00788g), 2015-01-01
Supplement: c5ta00788g1.pdf [file c5ta00788g1.pdf]

## Supporting information

### Spectroelectrochemical Investigation of Redox States in a Polypyrrole/Lignin Composite Electrode Material

F. N. Ajjan <sup>†,a</sup>, M. J. Jafari <sup>†,b</sup>, T. Rębiś<sup>c</sup>, T. Ederth<sup>b</sup> and O. Inganäs\*.

<sup>a</sup> F.N. Ajjan, Prof. O. Inganäs  
Biomolecular and organic electronics  
IFM, Linköping University  
S-581 83, Linköping, Sweden  
E-mail: fataj@ifm.liu.se.com; [oling@ifm.liu.se](mailto:oling@ifm.liu.se)

<sup>b</sup> M.J. Jafari, T. Ederth  
Division of Molecular Physics  
IFM, Linköping University  
S-581 83, Linköping, Sweden

<sup>c</sup> T. Rębiś  
Institute of Chemistry and Technical Electrochemistry  
Poznan University of Technology  
Piotrowo 3, 60–965, Poznan, Poland.

As it is observed in Figure S1A. the continuous redox reaction, in the presence of only lignin, occurs at very high potential (line red). Probably, at this current conditions, lignin starts to be oxidized at ca. 1.2 V (Figure S1B.). However, the kinetics of this process may be slow and potential increase fast reaching the value of electrolyte decomposition/gold oxidation.

In the presence of Py and Lig/Py the potential is much lower (ca. 0.6 V). This indicates that in such current conditions the only expected process is Py oxidation and lignin doping.

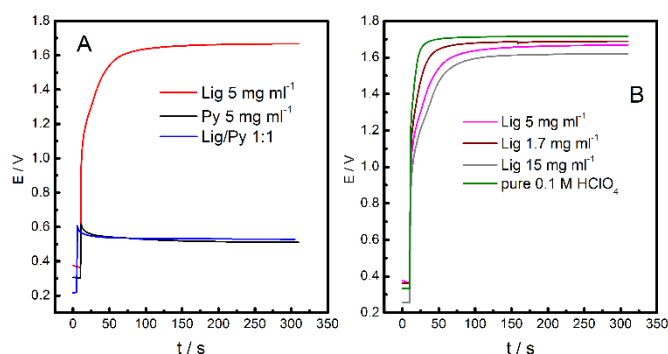

Figure S1. (A) Galvanostatic curves recorded at current density of 0.25 mA cm<sup>-2</sup> in the presence of 5 g L<sup>-1</sup> of Lig (red line), 5 g L<sup>-1</sup> of Py (black line) and mixture of 1:1 Lig/Py (5 g L<sup>-1</sup> of Lig and 5 g L<sup>-1</sup> of Py) (blue line). (B) as (A) different concentration of Lig and pure 0.1 M HClO<sub>4</sub>.

From the analysis of the potentiodynamic curves (Figure S2.) it can be assumed that oxidation of Py occurs at lower potential than lignin. This behavior means that Py is oxidized before lignin reaches its oxidation potential.

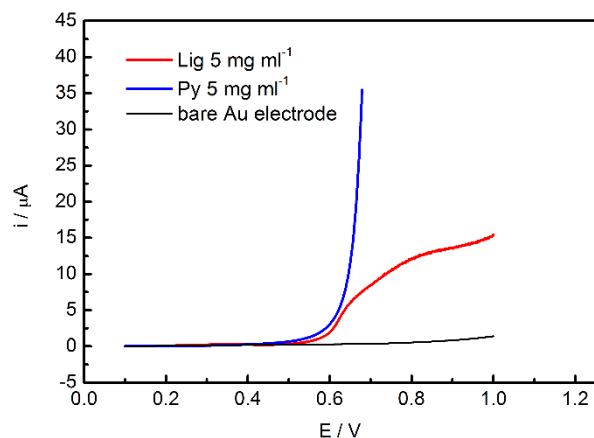

Figure S2. Potentiodynamic curves recorded at rotating disc electrode (500 r.p.m.) at scan rate of  $5 \text{ mV s}^{-1}$  for  $5 \text{ g L}^{-1}$  (red line) of lignin and  $5 \text{ g L}^{-1}$  (blue line) of pyrene.

Figure S3. shows the main evidence that only incorporation of lignin takes place during electropolymerization. The activation (oxidation) of lignin in the composite is completed after 20 subsequent CV scans in the range of potential exceeding  $0.6 \text{ V}$  vs Ag/AgCl.

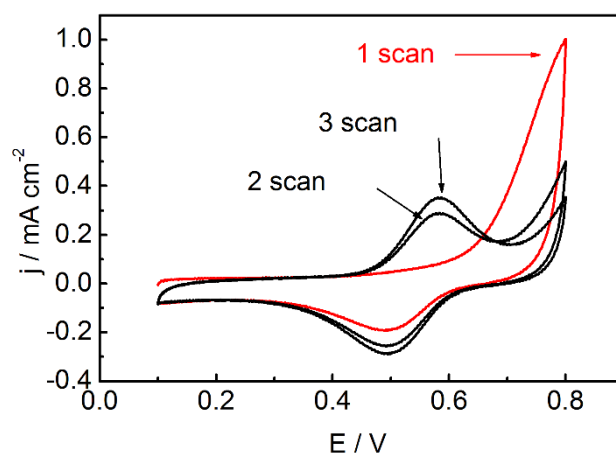

Figure S3. Cyclic voltammograms for PPy/Lig composite showing oxidation of Lig.
